# Supplementary material for: Influence of the even–odd effect on the crystal structure, band structure and optical properties of hybrid crystals of the [H3N-(CH2)n-NH3]PbX4 (n = 4–8 and X = Cl, Br, and I) type
Source: Royal Society of Chemistry journal article supplement (doi:10.1039/d4dt01811g), 2024-01-01
Supplement: d4dt01811g1.pdf [file d4dt01811g1.pdf]

## Influence of the even-odd effect on the crystal structure, band structure and optical properties of hybrid crystals of the $\text{H}_3\text{N}-(\text{CH}_2)_n-\text{NH}_3\text{PbX}_4$ ( $n=4-8$ , $\text{X}=\text{Cl}$ , $\text{Br}$ , $\text{I}$ ) type

M.I. Balanov<sup>1,2,3</sup>, A.V. Emeline<sup>3</sup>, D.S. Shtarev<sup>1,2\*</sup>

<sup>1</sup> – Department of Materials Science, Shenzhen MSU-BIT University, PRC

<sup>2</sup> – Institute of High Technologies and Advanced Materials of the Far Eastern Federal University, Vladivostok, Russia

<sup>3</sup> Saint-Petersburg State University, Laboratory 'Photonics of crystals', St.-Petersburg, Russia.

\* Corresponding author's e-mail: shtarev@mail.ru

### Supplementary materials

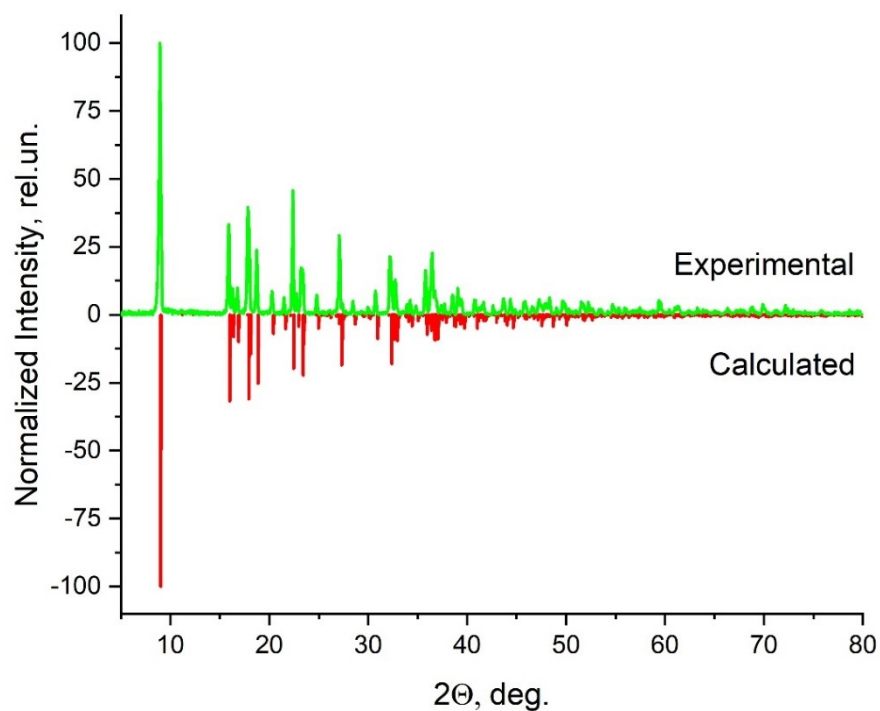

**Figure S1.** Powder X-ray diffraction pattern of the hybrid crystal  $(\text{C}_4)\text{DAPbCl}_4$  (green line at top) compared to that calculated from the known structure (CCDC # 1501643, red line at bottom).

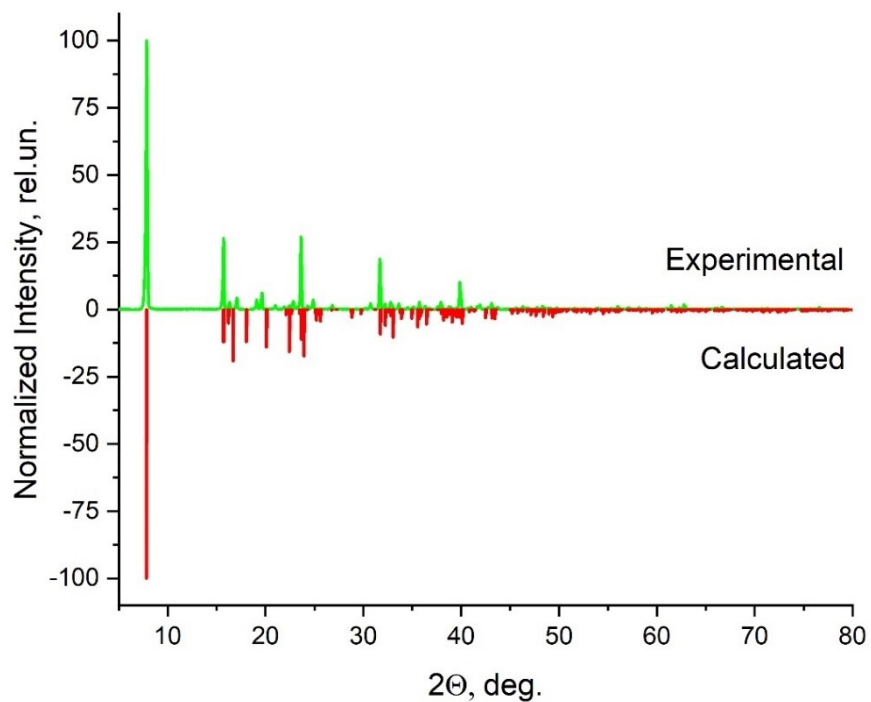

**Figure S2.** Powder X-ray diffraction pattern of the hybrid crystal  $(C_5)DAPbCl_4$  (green line at top) compared to that calculated from the known structure ([14], red line at bottom).

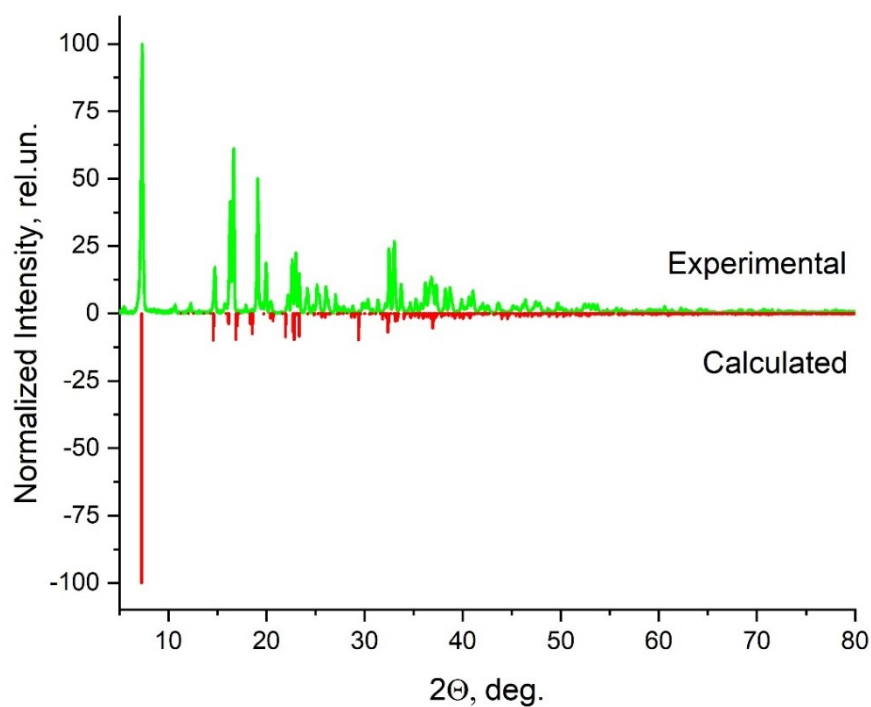

**Figure S3.** Powder X-ray diffraction pattern of the hybrid crystal  $(C_6)DAPbCl_4$  (green line at top) compared to that calculated from the known structure ([13], red line at bottom).

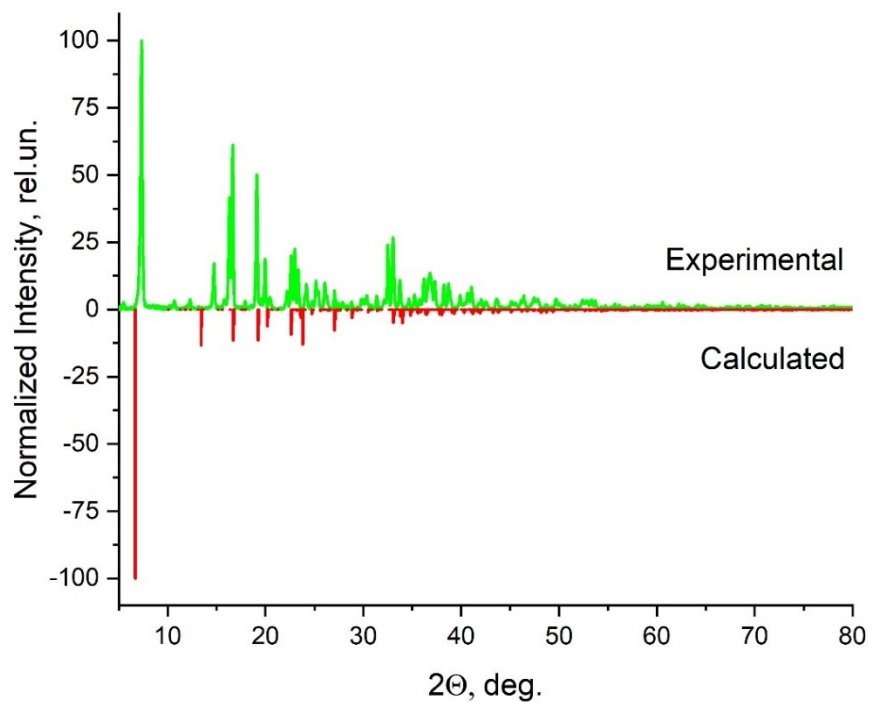

**Figure S4.** Powder X-ray diffraction pattern of the hybrid crystal  $(C_7)DAPbCl_4$  (green line at top) compared to that calculated from structural data obtained in current study (red line at bottom).

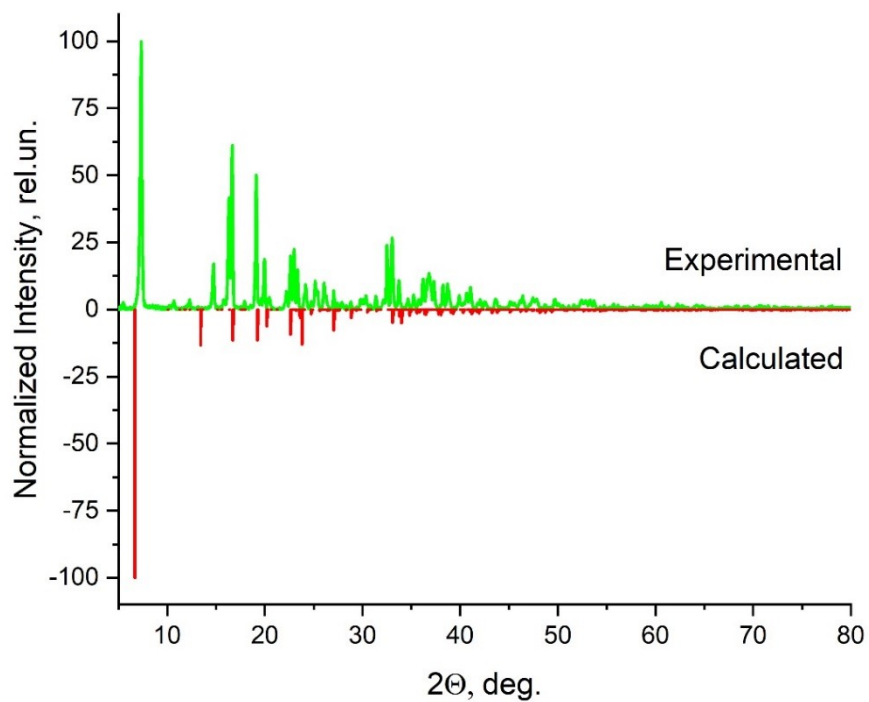

**Figure S5.** Powder X-ray diffraction pattern of the hybrid crystal  $(C_8)DAPbCl_4$  (green line at top) compared to that calculated from structural data obtained in current study (red line at bottom).

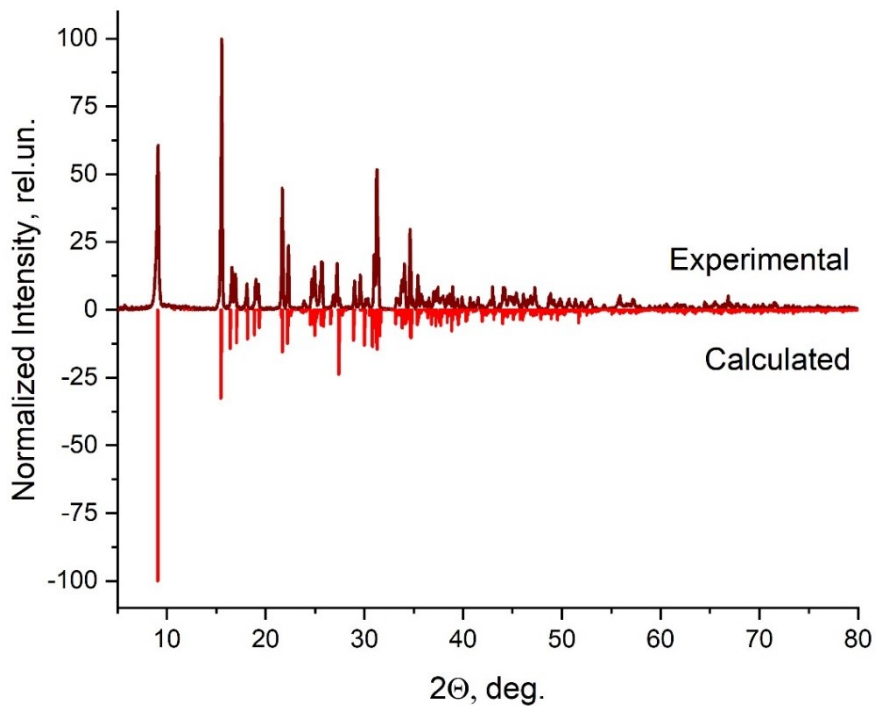

**Figure S6.** Powder X-ray diffraction pattern of the hybrid crystal  $(C_4)DAPbBr_4$  (dark-red line at top) compared to that calculated from the known structure (CCDC # 1545802, red line at bottom).

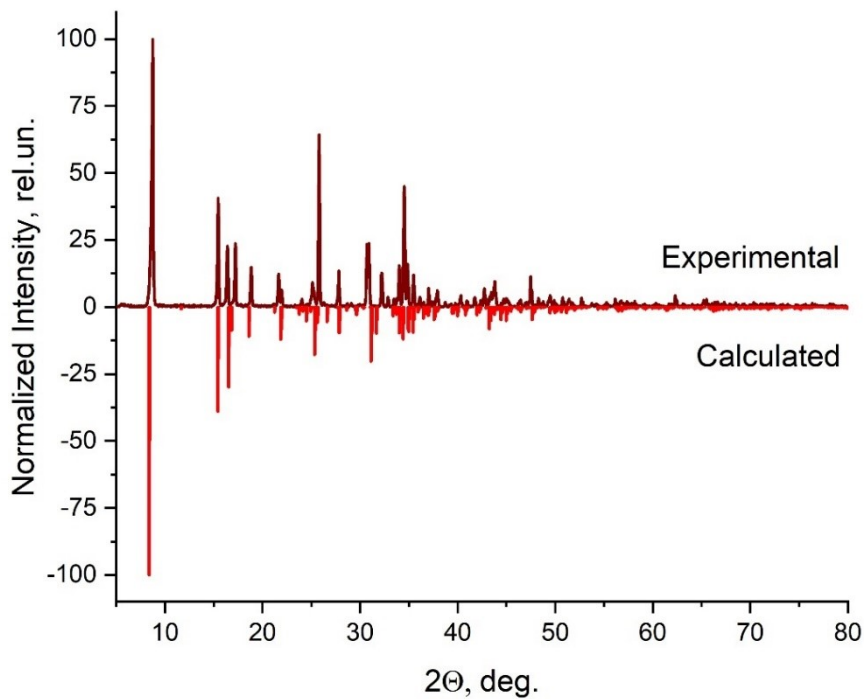

**Figure S7.** Powder X-ray diffraction pattern of the hybrid crystal  $(C_5)DAPbBr_4$  (dark-red line at top) compared to that calculated from the known structure ([14], red line at bottom).

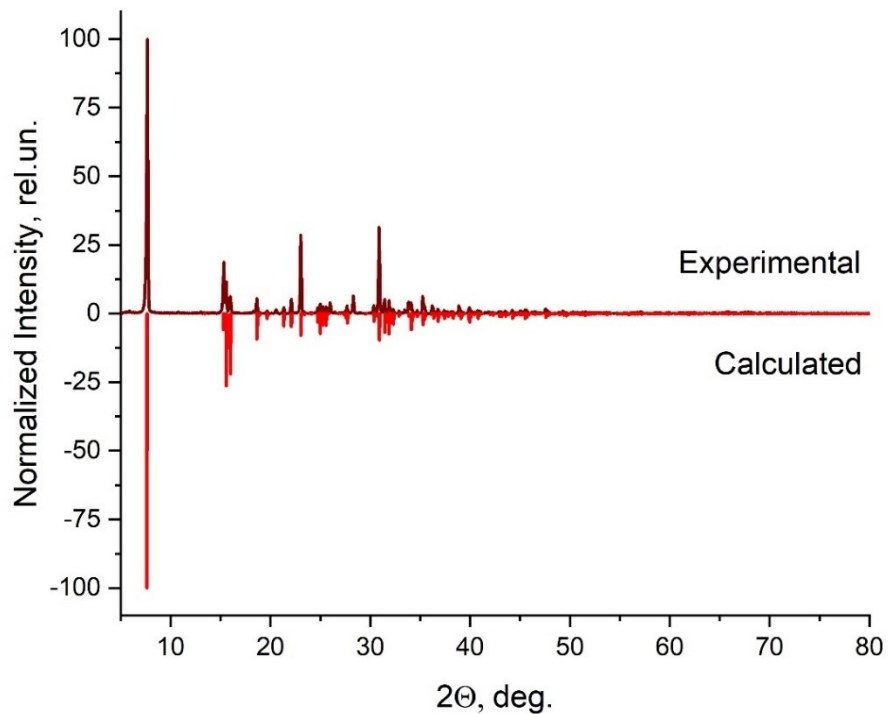

**Figure S8.** Powder X-ray diffraction pattern of the hybrid crystal  $(C_6)DAPbBr_4$  (dark-red line at top) compared to that calculated from the known structure (CCDC # 7203880, red line at bottom).

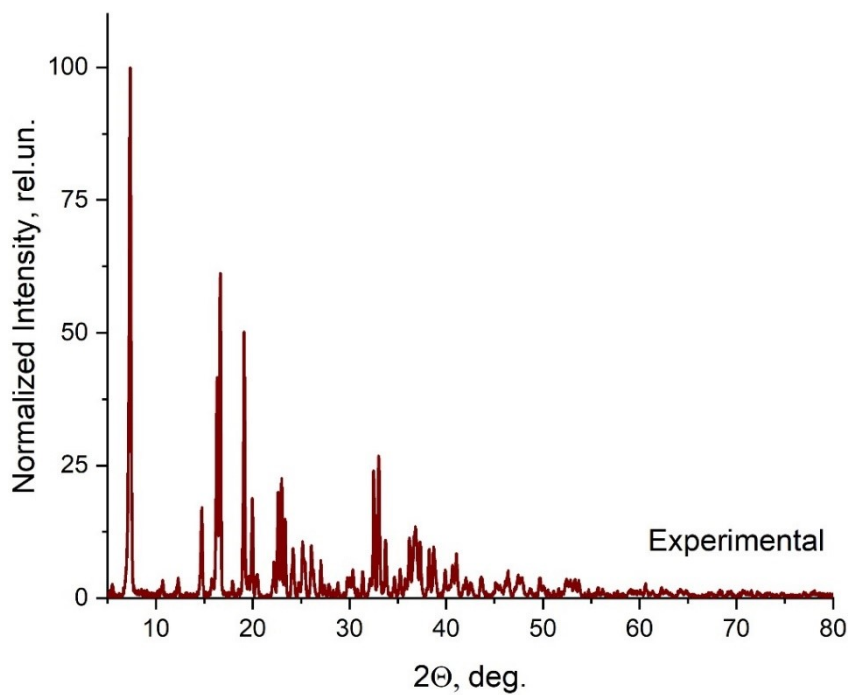

**Figure S9.** Powder X-ray diffraction pattern of the hybrid crystal  $(C_7)DAPbBr_4$

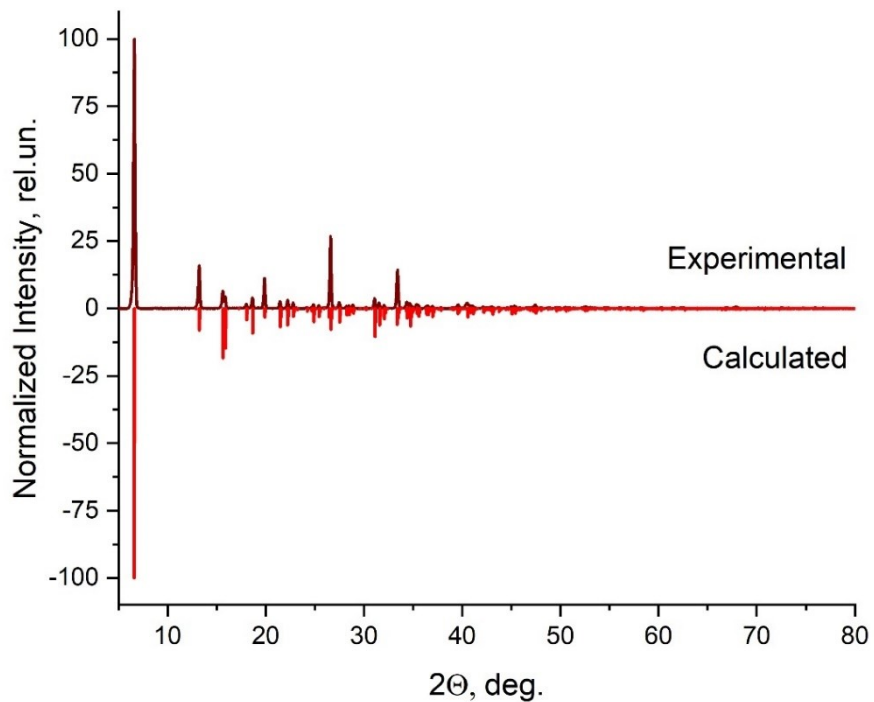

**Figure S10.** Powder X-ray diffraction pattern of the hybrid crystal  $(C_8)DAPbBr_4$  (dark-red line at top) compared to that calculated from the known structure (CCDC # 1545806, red line at bottom).

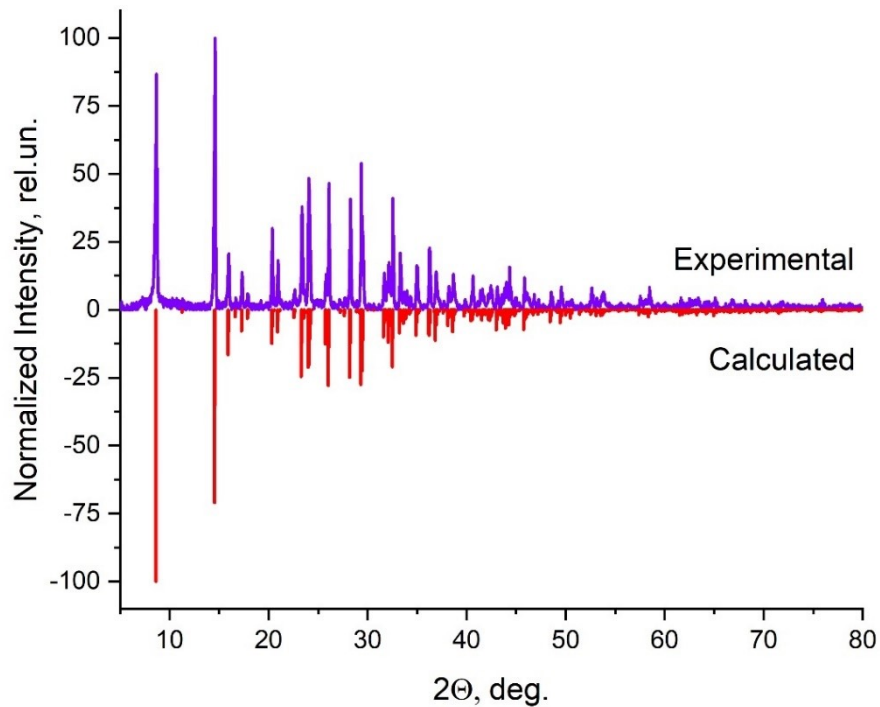

**Figure S11.** Powder X-ray diffraction pattern of the hybrid crystal  $(C_4)DAPbI_4$  (purple line at top) compared to that calculated from the known structure (CCDC # 7207475, red line at bottom).

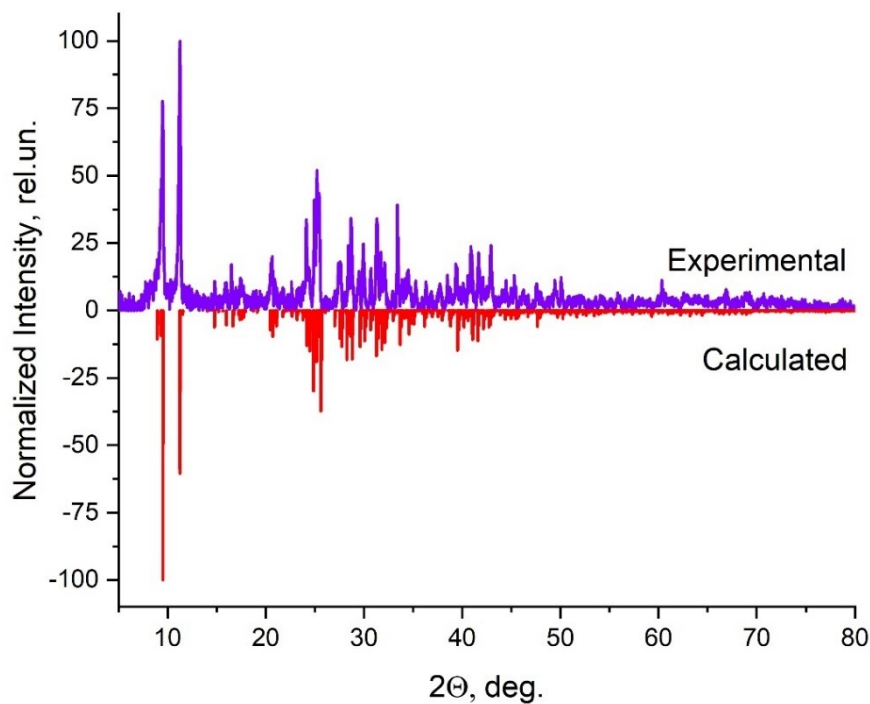

**Figure S12.** Powder X-ray diffraction pattern of the hybrid crystal  $(C_5)DAPbI_4$  (purple line at top) compared to that calculated from the known structure ([14], red line at bottom).

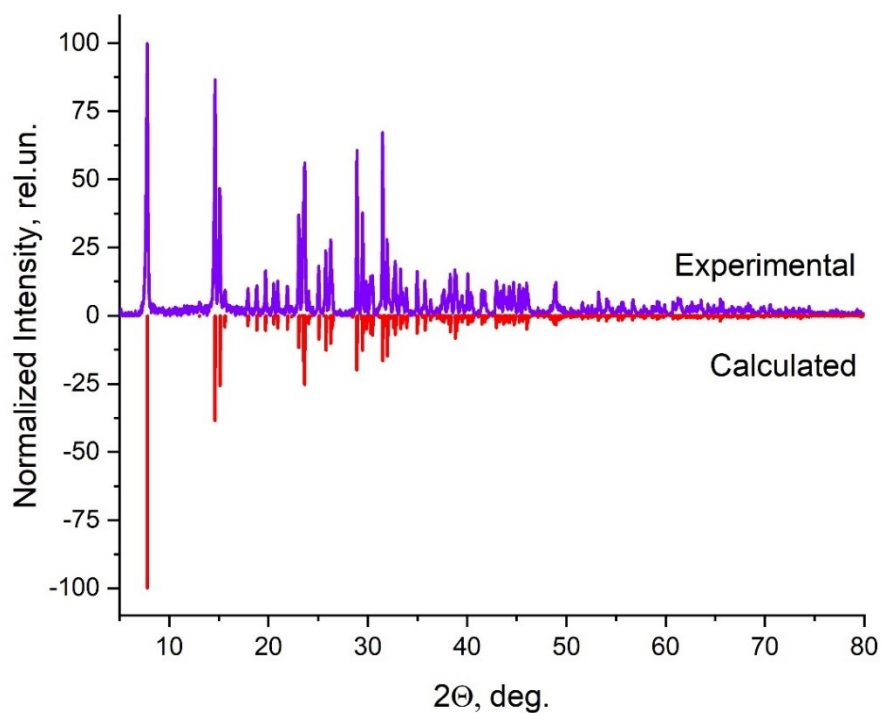

**Figure S13.** Powder X-ray diffraction pattern of the hybrid crystal  $(C_6)DAPbI_4$  (purple line at top) compared to that calculated from the known structure (CCDC # 7203879, red line at bottom).

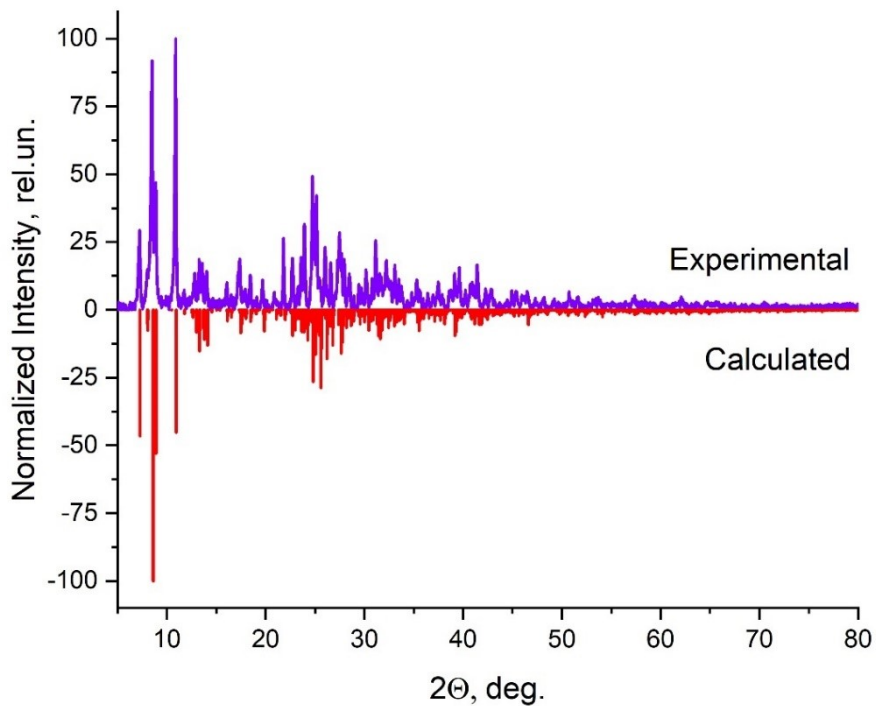

**Figure S14.** Powder X-ray diffraction pattern of the hybrid crystal  $(C_7)DAPbI_4$  (purple line at top) compared to that calculated from the known structure (CCDC # 7207476, red line at bottom).

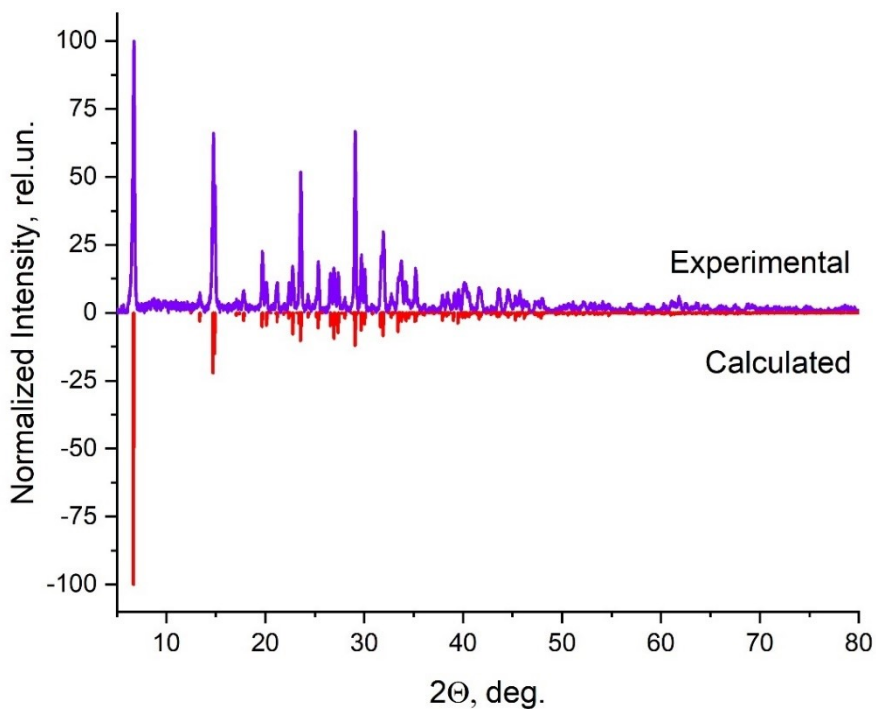

**Figure S15.** Powder X-ray diffraction pattern of the hybrid crystal  $(C_8)DAPbI_4$  (purple line at top) compared to that calculated from the known structure (CCDC # 7207477, red line at bottom).



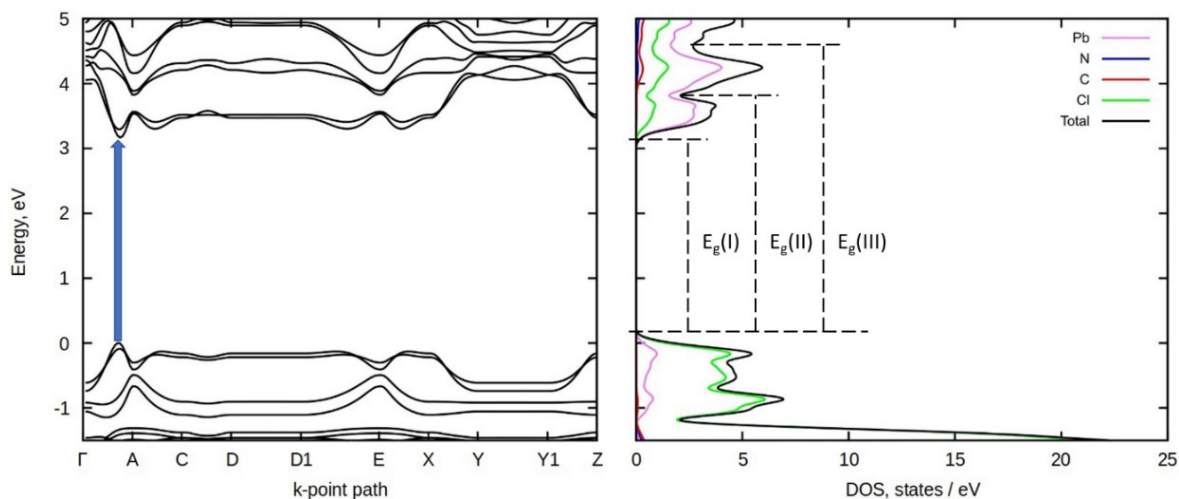

**Figure S16.** Electronic band structure (left) and density of states (right) for a  $(C_5)DAPbCl_4$  hybrid crystal. The blue arrow indicates the electronic transition between the top of the valence band and the bottom of the conduction band.

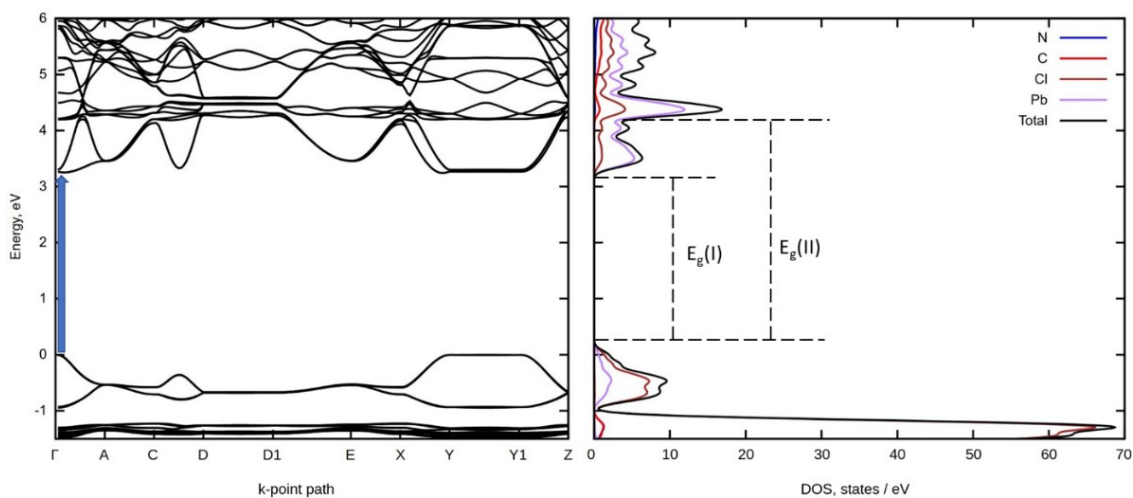

**Figure S17.** Electronic band structure (left) and density of states (right) for a  $(C_6)DAPbCl_4$  hybrid crystal. The blue arrow indicates the electronic transition between the top of the valence band and the bottom of the conduction band.

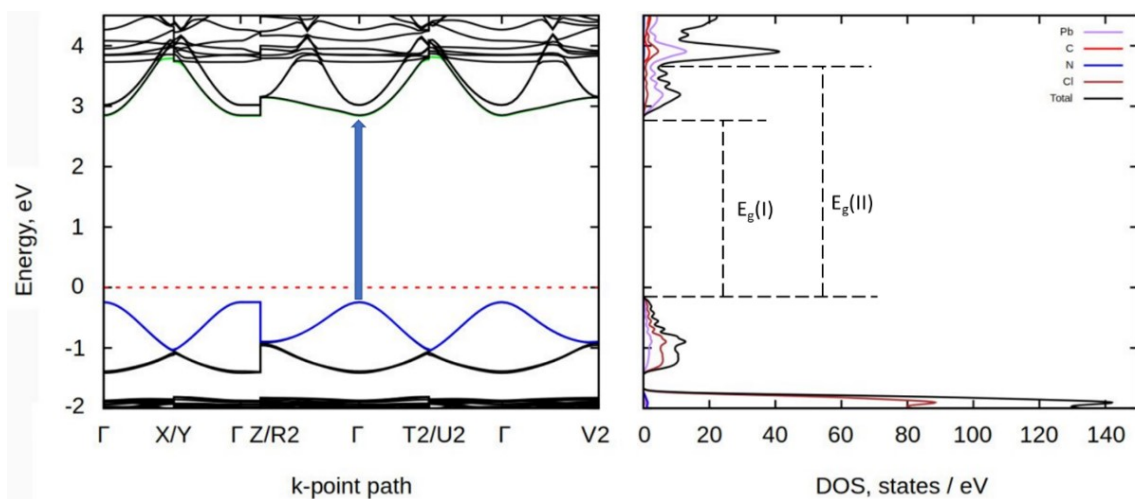

**Figure S18.** Electronic band structure (left) and density of states (right) for a  $(C_7)DAPbCl_4$  hybrid crystal. The blue arrow indicates the electronic transition between the top of the valence band and the bottom of the conduction band.

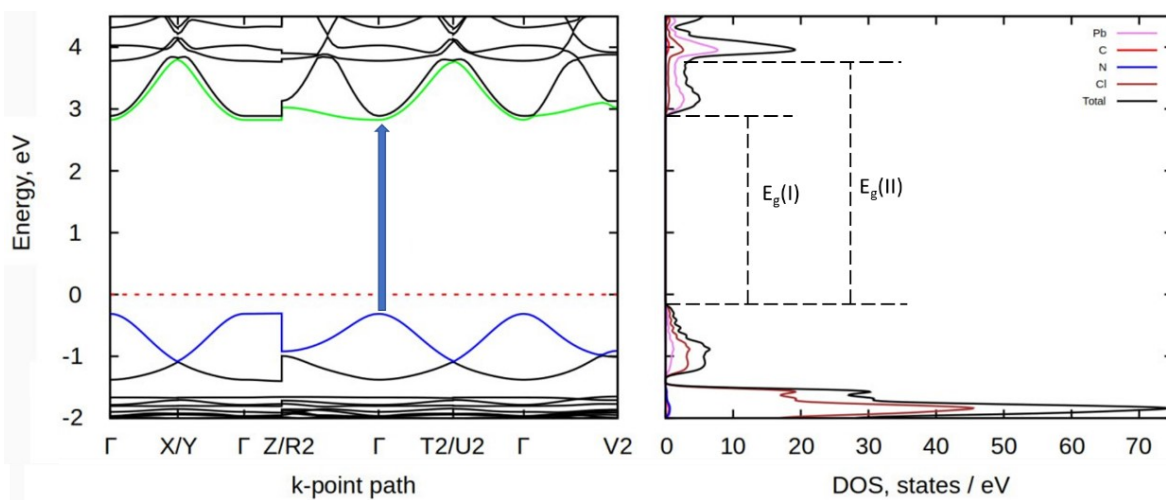

**Figure S19.** Electronic band structure (left) and density of states (right) for a  $(C_8)DAPbCl_4$  hybrid crystal. The blue arrow indicates the electronic transition between the top of the valence band and the bottom of the conduction band.

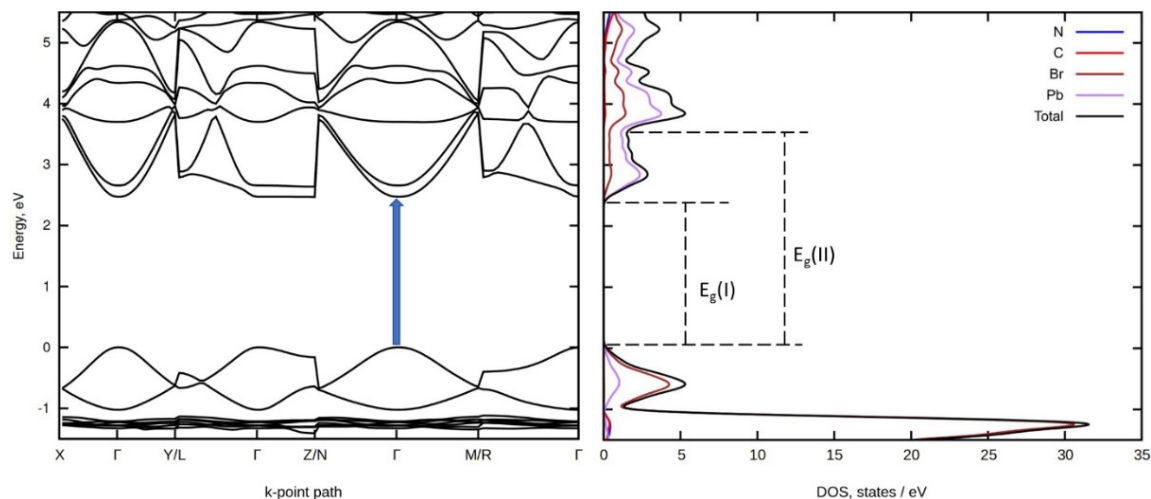

**Figure S20.** Electronic band structure (left) and density of states (right) for a  $(C_4)DAPbBr_4$  hybrid crystal. The blue arrow indicates the electronic transition between the top of the valence band and the bottom of the conduction band.

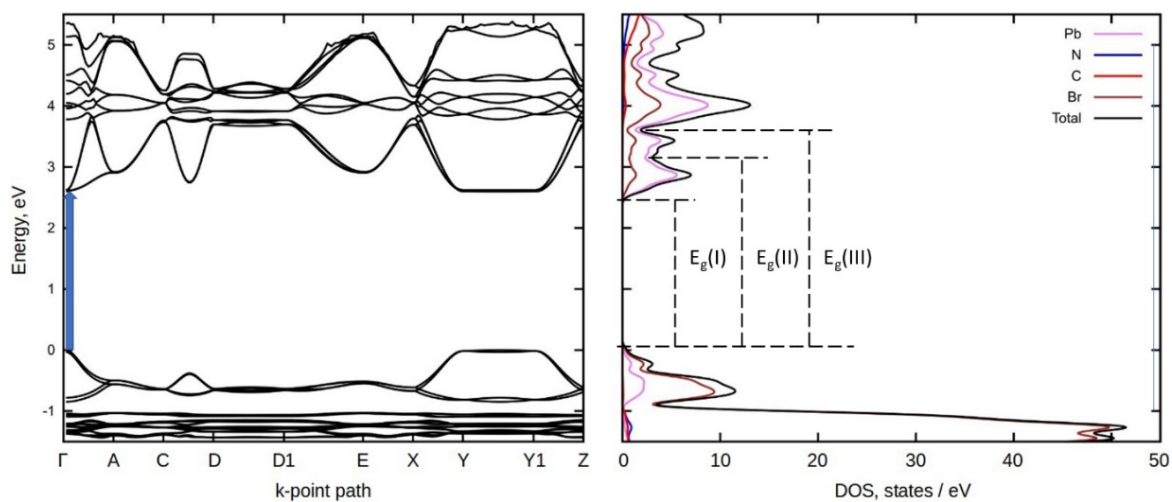

**Figure S21.** Electronic band structure (left) and density of states (right) for a  $(C_5)DAPbBr_4$  hybrid crystal. The blue arrow indicates the electronic transition between the top of the valence band and the bottom of the conduction band.

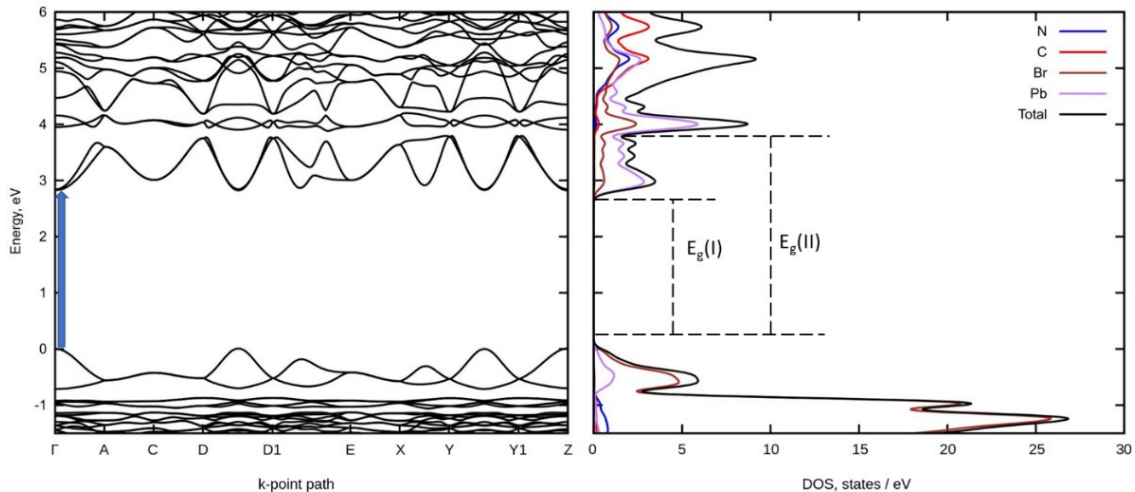

**Figure S22.** Electronic band structure (left) and density of states (right) for a  $(C_6)DAPbBr_4$  hybrid crystal. The blue arrow indicates the electronic transition between the top of the valence band and the bottom of the conduction band.

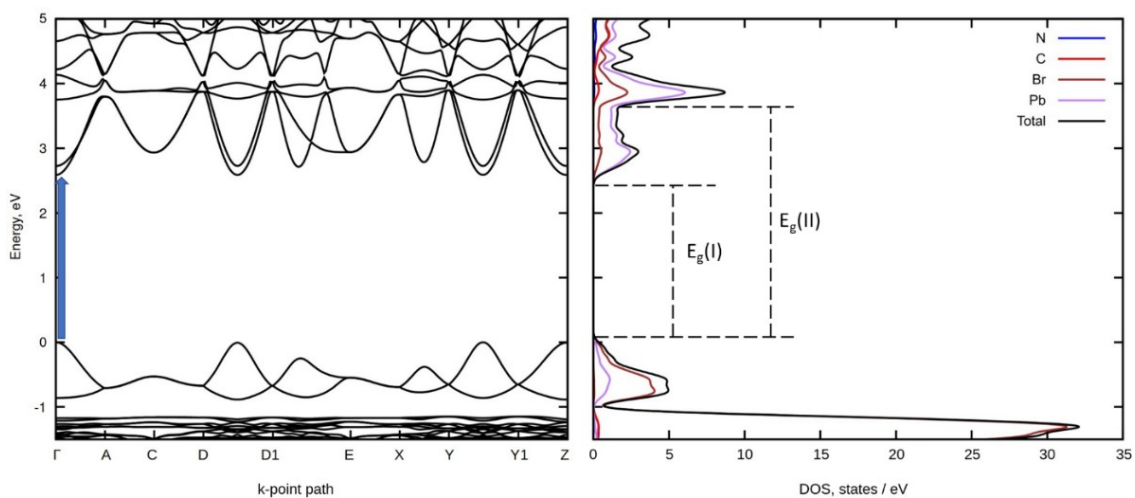

**Figure S23.** Electronic band structure (left) and density of states (right) for a  $(C_8)DAPbBr_4$  hybrid crystal. The blue arrow indicates the electronic transition between the top of the valence band and the bottom of the conduction band.

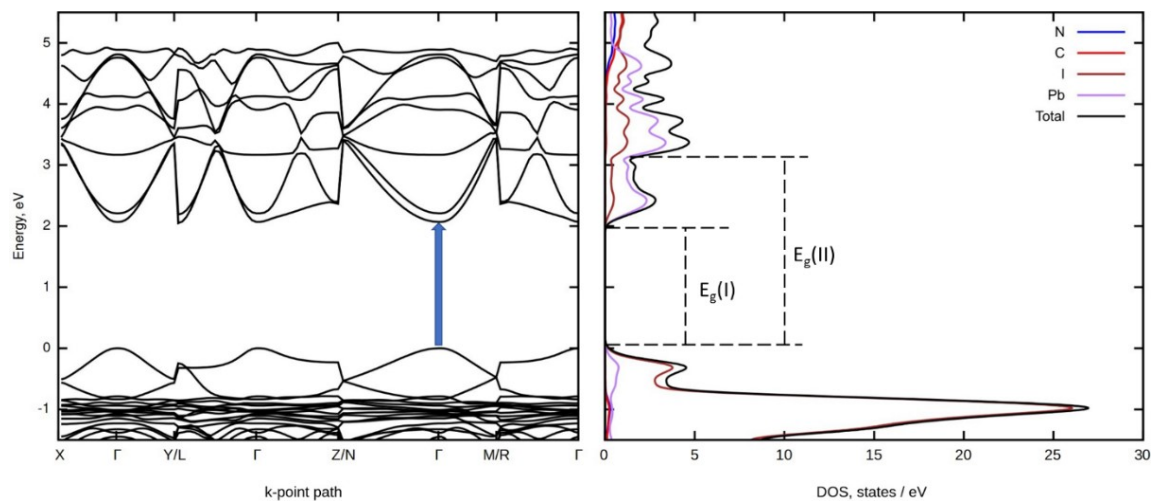

**Figure S24.** Electronic band structure (left) and density of states (right) for a  $(C_4)DAPbI_4$  hybrid crystal. The blue arrow indicates the electronic transition between the top of the valence band and the bottom of the conduction band.

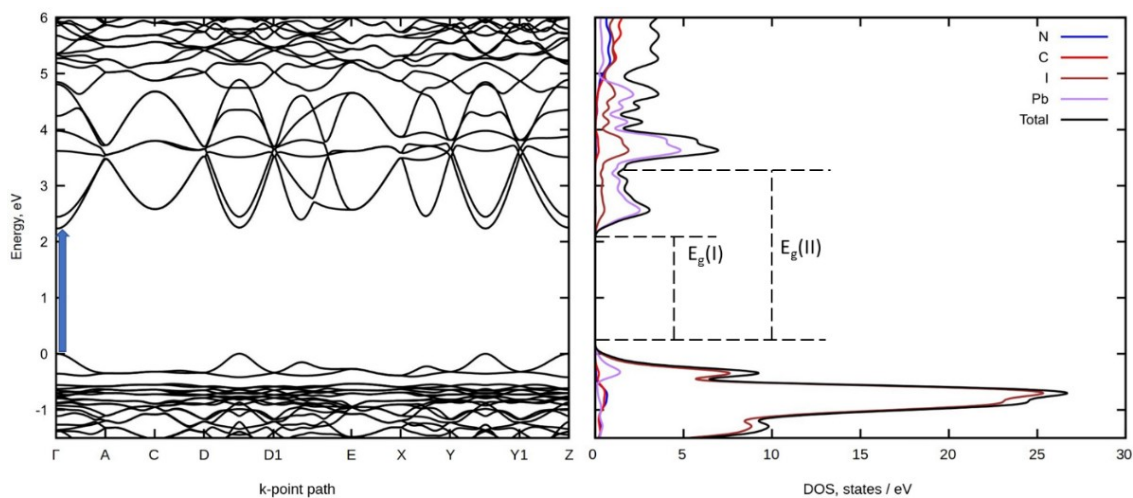

**Figure S25.** Electronic band structure (left) and density of states (right) for a  $(C_6)DAPbI_4$  hybrid crystal. The blue arrow indicates the electronic transition between the top of the valence band and the bottom of the conduction band.

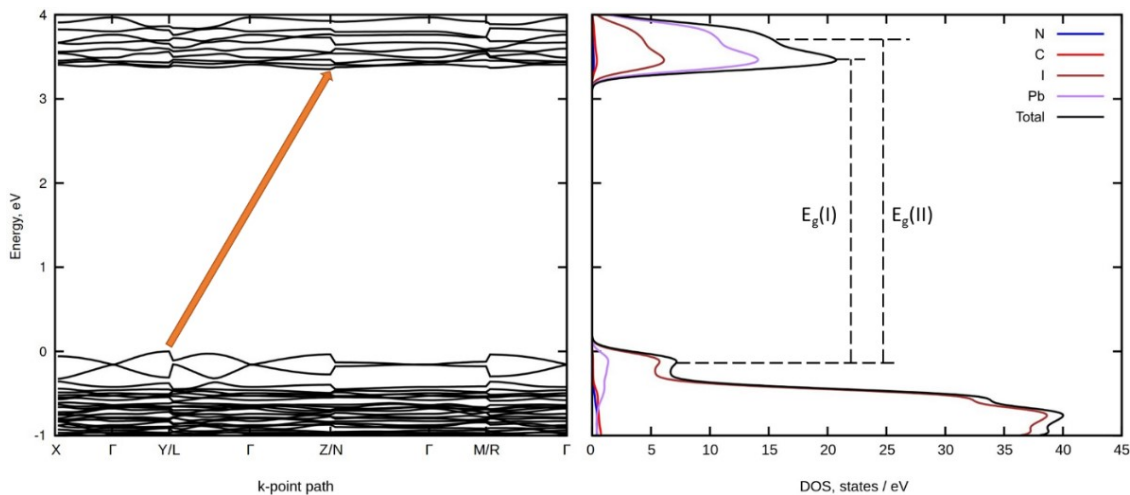

**Figure S26.** Electronic band structure (left) and density of states (right) for a  $(C_7)DAPbI_4$  hybrid crystal. The blue arrow indicates the electronic transition between the top of the valence band and the bottom of the conduction band.

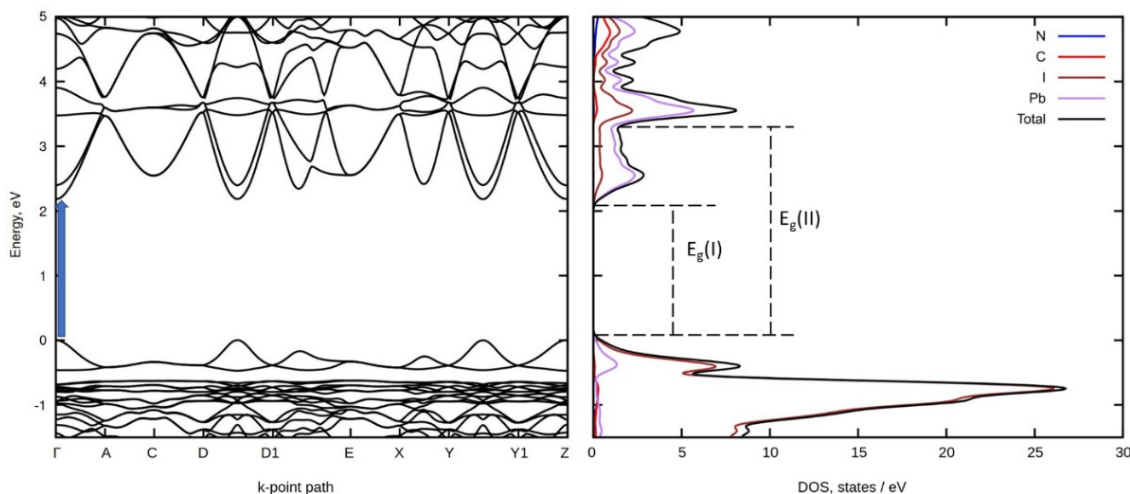

**Figure S27.** Electronic band structure (left) and density of states (right) for a  $(C_8)DAPbI_4$  hybrid crystal. The blue arrow indicates the electronic transition between the top of the valence band and the bottom of the conduction band.



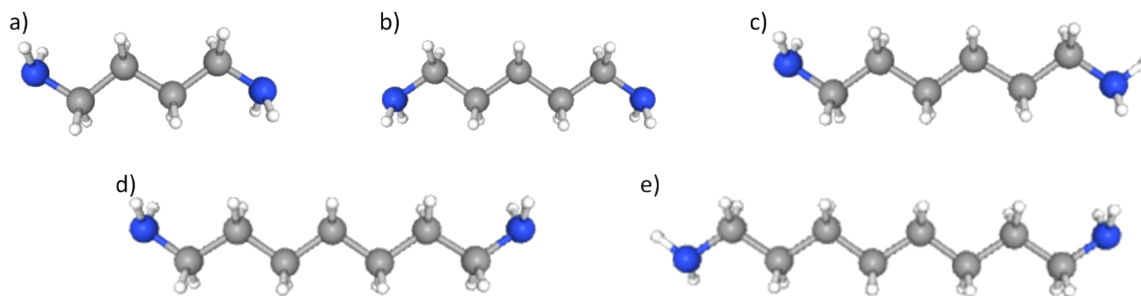

**Figure S28.** The structure of organic molecules acting as cations in the hybrid crystals investigated are (a) 1,4-diaminobutane ( $C_4DA$ ), (b) 1,5-diaminopentane ( $C_5DA$ ), (c) 1,6-diaminohexane ( $C_6DA$ ), (d) 1,7-diaminoheptane ( $C_7DA$ ), and (e) 1,8-diaminooctane ( $C_8DA$ ).

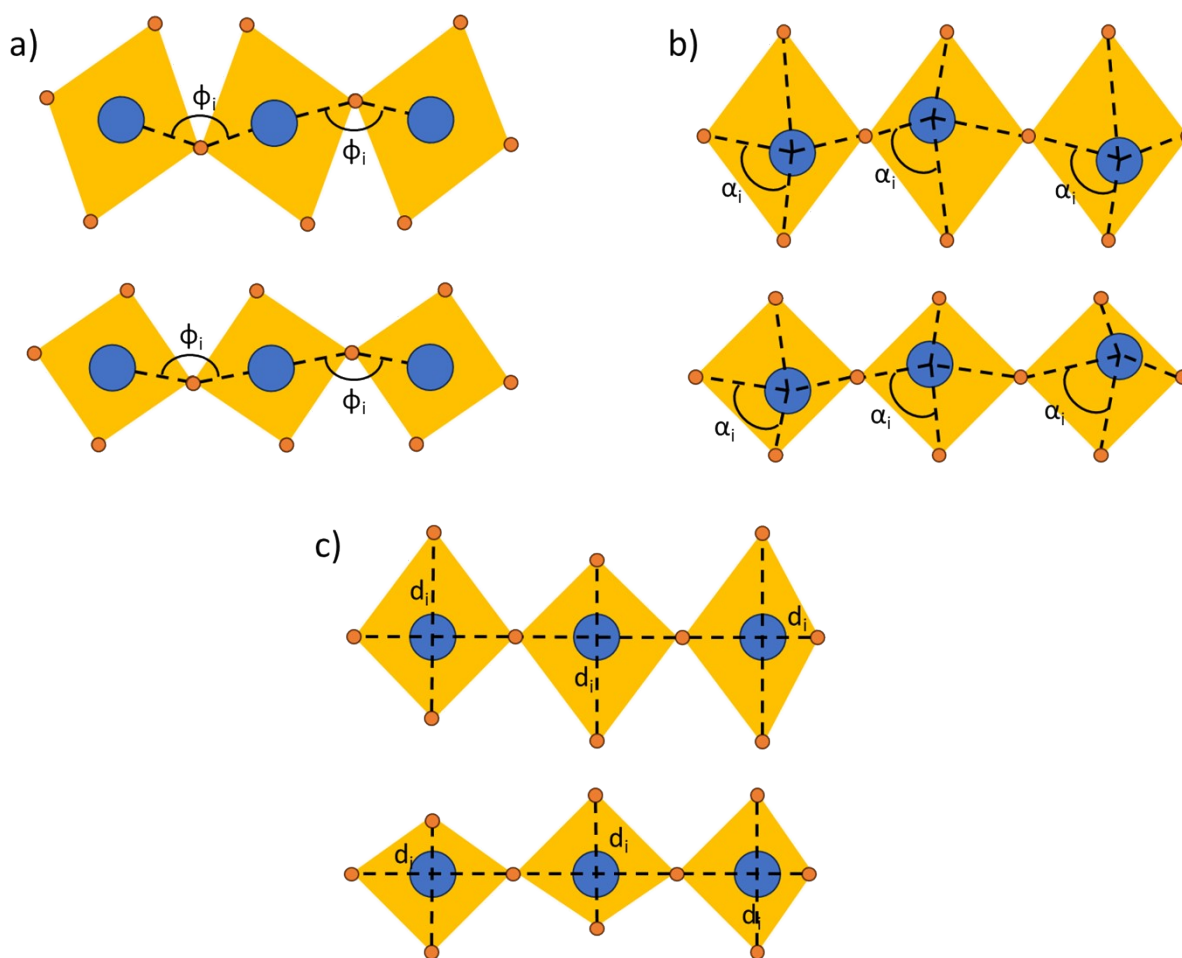

**Figure S29.** Disordered variants of inorganic octahedra in real crystals.
